1 **The Out of East Asia model versus the African Eve model of modern human**  
2 **origins in light of ancient mtDNA findings**

3

4 **Ye Zhang and Shi Huang**

5 Key Laboratory of Medical Genetics, School of Life Sciences, Xiangya Medical School,

6 Central South University, 110 Xiangya Road, Changsha, Hunan 410078, P.R. China

7

8 **Keywords:** mtDNA, ancient DNAs, Out of East Asia model, African Eve model, Out of

9 Africa model, MGD theory, neutral theory, molecular clock

10

---

11 **Abstract**

12       The first molecular model of modern human origins published in 1983 had the  
13 mtDNA phylogenetic tree rooted in Asia. This model was subsequently overlooked  
14 and superseded by the African Eve model in 1987 that was premised on the  
15 unrealistic infinite site assumption and the now failed molecular clock hypothesis. We  
16 have recently developed a new framework of molecular evolution, the maximum  
17 genetic diversity (MGD) hypothesis, which has in turn led us to discover a new model  
18 of modern human origins with the roots of uniparental DNAs placed in East Asia.  
19 While the African mtDNA Eve model has haplotype N as ancestral to R, our Asia  
20 model places R as the ancestor of all. We here examined ancient mtDNAs from the  
21 literature focusing on the relationship between N and R. The data showed that all  
22 three oldest mtDNAs were R with the 45000 year old Ust-Ishim a basal type and the  
23 two ~40000 year old samples sub-branch of R. Among the numerous mtDNAs of  
24 39500-30000 year old, most were R subtype U and only two were N samples, the  
25 39500 year old Oase1 and the 34425 year old Salkhit. These N types are basal and  
26 hence likely close to the root of N. These ancient DNA findings suggest that basal R is  
27 ~5000 years older than basal N, thereby confirming the East Asia model and  
28 invalidating the African Eve model.

29

30

---

31 **Introduction**

32 Investigation into the question of human origins has a long history and two  
33 competing models termed “Multiregional” and the “Recent Out-of-Africa” hypothesis  
34 have been proposed [1]. In the Multiregional model [2-4], recent human evolution is  
35 seen as the product of the early and middle Pleistocene radiation of *Homo erectus*  
36 from Africa. Thereafter, local differentiation led to the establishment of regional  
37 populations which evolved to produce anatomically modern humans (AMH) in  
38 different regions of the world. *Homo* has been a single species since the genus first  
39 appeared in the fossil record ~2.3-2.8 million years ago. The model has ample  
40 evidence from fossils and Paleolithic cultural remains but consistent molecular  
41 evidence has been lacking until very recently [5].

42 The single origin Recent Out of Africa model assumes that there was a relatively  
43 recent common ancestral population for *Homo sapiens* which already showed most if  
44 not all of the anatomical features shared by present day people. This population  
45 originated in Africa ~200 ky ago, followed by an initiation of African regional  
46 differentiation, subsequent radiation from Africa, and final establishment of modern  
47 regional characteristics outside Africa [1, 6]. These modern Africans replaced the  
48 archaic *Homo* in Eurasia with limited genetic mixing [7-11]. Support for this model  
49 comes from the African location of the earliest fossils of some AMH features [12, 13]  
50 and the molecular clock and neutral theory interpretation of the greater genetic  
51 diversity in Africans [6]. However, completely modern humans older than 80000 years  
52 have yet to be found in Africa but did exist in Daoxian South China, although the

---

53 Daoxian site has no skeletons other than teeth, leaving it uncertain whether features  
54 other than teeth are also completely modern [14, 15].

55 While long overlooked, there is in fact a third model based on mtDNA analyses. In  
56 1983, researchers derived the first mtDNA phylogenetic tree and rooted the tree in  
57 Asia [16]. Unfortunately, this Asia model was superseded 4 years later by the African  
58 Eve model without any valid reasons [6]. The African Eve model assumes the  
59 molecular clock while the Asia model not. Given that the universal molecular clock is  
60 widely acknowledged to be unreal [17-22], a reexamination of these models is clearly  
61 warranted. Furthermore, the Africa model requires the neutral theory and the infinite  
62 site assumption, which, while largely sound as a null model and a framework for  
63 pre-saturation evolutionary processes, are not *a priori* valid and have met with great  
64 difficulties as an explanatory framework for most molecular evolutionary phenomena  
65 [23-27]. Obviously, inferring human origins by using genetic diversity data must wait  
66 until one has a complete understanding of what genetic diversity means.

67 We have in recent years examined the longstanding genetic diversity riddle and  
68 developed a more complete evolutionary account, the maximum genetic diversity  
69 (MGD) hypothesis, that has been productive in addressing both evolutionary and  
70 biomedical problems [21, 28-36]. The MGD theory has solved the two major puzzles of  
71 genetic diversity, the genetic equidistance phenomenon and the much narrower range  
72 of genetic diversity relative to the large variation in population size [27, 28]. The  
73 genetic equidistance result of Margoliash in 1963 is in fact the first and best evidence  
74 for MGD rather than linear distance as mis-interpreted by the molecular clock and in

---

75 turn the neutral theory [19-21, 28, 34, 37, 38]. The MGD regards the genome to be  
76 mostly functional and under stabilizing selection.

77       Based on the MGD theory, we have developed the “slow clock” method that only  
78 uses slow evolving DNAs for demographic inferences because they are more likely to  
79 be neutral and away from the saturation phase of evolution that is associated with fast  
80 evolving sites [5, 34, 39, 40]. Our analyses have led to a new scheme of modern  
81 human origins largely consistent with the multiregional model in terms of autosomes  
82 where the first split among major human groups is placed at ~1.9 million years ago [5].  
83 Different from the multiregional model, however, our new scheme has solved the  
84 origin of the modern uniparental DNAs that obviously can only have originated from a  
85 single region as the coalescence time of the modern mtDNA lineages is much shorter  
86 than 1.9 million years and as archaic humans, such as Neanderthals, Denisovans,  
87 and Heidelbergensis, clearly carried distinct lineages [41]. Our model placed the roots  
88 of both mtDNA and Y chromosome in East Asia [5], which independently confirms the  
89 1983 finding on the Asia origin of mtDNA [16]. Our model furthermore specifically  
90 places the least differentiated haplotype R0 or R\* as the ancestor of all mtDNA  
91 haplotypes, which is in contrast to the African Eve model that puts R downstream of  
92 haplotype N (Figure 1). The R0 haplotype is most common today in the Southern  
93 Chinese group in the 1000 genomes project, implicating the origin of the modern  
94 mtDNA lineage in Southern China [5].

95       The Africa model assumes the infinite site assumption to classify haplotype  
96 relationships based on inference of ancestral and derived alleles with the allele

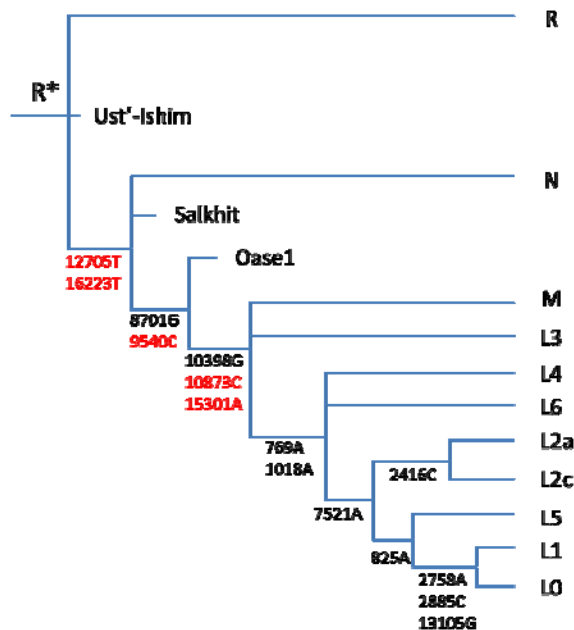

97

98

99 **Figure 1. mtDNA phylogenetic tree of the Out of East Asia model.** Only major

100 branches and representative mutations are shown. Slow evolving sites (altering protein

101 and RNA sequences) in black and fast sites in red. Also shown are several

102 representative ancient DNAs.

103

104 identical to that of chimpanzees as the ancestral. However, the infinite site model is in

105 fact unrealistic and there is overwhelming evidence of mutation saturation as

106 explained by the MGD theory, which makes the inference of ancestral alleles

107 meaningless. Actually, the Africa Eve phylogenetic tree cannot even meet the

108 minimum standard of a scientific model, i.e., self-consistency, as it contains huge

109 number of back mutations (reversions to an ancestral allele) that violate the infinite

110 side assumption required to build the Africa model in the first place. These mutations

111 can be found in the official mtDNA tree, phylotree (<http://www.phylotree.org/>), and are

112 designated by an exclamation mark (!) following the position numbers in phylotree.

---

113 The total number of these back mutations in phylotree is 1180 per our manual  
114 counting. For example, of the 5 defining mutations for haplotype N, one at site 15301  
115 is a back mutation.

116 Another premise (inferred from the molecular clock) for the Africa model is that  
117 the original ancestor group should today show highest genetic diversity. However, as  
118 the MGD theory shows, different groups may show different maximum genetic  
119 diversity and human groups today are at saturation level of genetic diversity for the  
120 fast evolving DNAs [5].

121 Unlike the Africa model, our Asia model, as well as that of Johnsen et al [16],  
122 however, is based on the common sense that the original type should be the least  
123 differentiated. The original ancestor should mostly carry major alleles at SNP sites  
124 because as the ancestor population grew in size only a small fraction of the group  
125 should carry alternative mutant alleles (mutations are rare events). Indeed, the 45000  
126 year old Ust'-Ishim's mtDNA had fewer SNPs to begin with and the one he did have  
127 are all common alleles in today's population (>67%) except one site 16150 [10]. The  
128 Asia model also regards mutations in mtDNA to be functional, which has ample  
129 evidential support [26, 33, 42, 43], and classifies haplotypes based on sharing of  
130 alleles with more weight on the slow evolving sites (altering protein or RNA sequences)  
131 [5]. Hence, the Asia model is inherently more sound and self-consistent than the  
132 Africa model due to stronger theoretical foundations and far more realistic  
133 assumptions. Nonetheless, direct experimental test of these models is required to be  
134 absolutely certain. Recent discoveries in ancient DNAs have made such test possible

---

135 and we here found the Asia model strongly supported by the ancient mtDNAs findings  
136 from the recent literature.

137

### 138 **Results and discussion**

139 The relationship between N and R is the most obvious difference between the  
140 Africa and the Asia model. Of the three oldest mtDNAs, all turned out to be R, the  
141 45000 year old Ust-Ishim from Siberia [10], the 40328 year old Tianyuan from  
142 Northern China [44], and the 39805 year old Fumane2 from Riparo Bombrini Italy [45].  
143 Tianyuan was haplotype B as reported. Fumane2 was closest to extant HV or H  
144 haplotype (KP34013 and KF523402) per our analyses of the NCBI database. Only the  
145 oldest R sample Ust-Ishim was found to be basal, consistent with expectations.

146 Among relatively younger samples of 39500-30000 years old, two N samples  
147 were found, the 39500 year old Oase1 from Romania [9] and the 34425 year old  
148 Salkhit from Mongolia [46]. However, in contrast to the rarity of N, numerous samples  
149 of R subtype U were found in Europe as recently summarized by Deviese et al [46],  
150 indicating that R\* basal samples may only be expected near the time when the root of  
151 R lived, which should be close to 45000 years ago as marked by the R\* sample  
152 Ust-Ishim. If R is indeed the root of modern mtDNA, then the modern lineage should  
153 not be much older than 45000 years old. In fact, while partially modern skeletons can  
154 be found in many sites in Africa and Asia at 310000-80000 years ago [14, 15, 47-53],  
155 no human skeletons that were fully modern for all key skeletal features have been  
156 found prior to 50000 years ago. As the demise of Neanderthals is thought to be



---

157 associated with the arrival of modern humans and occurred at ~40000 years ago [45],  
158 one can infer that the appearance of fully modern humans may not be much earlier  
159 than 40000 years ago. If it is much earlier, one would have the difficulty to explain the  
160 long lag before the demise of Neanderthals.

161 Both the N samples were found to be basal N\* and not directly ancestral to any  
162 present day haplogroups [46]. As these two N\* samples had ages of 39500-34425  
163 years and no N subtypes were found in the numerous mtDNA samples from  
164 40000-30000 years ago, which is in contrast to the abundantly found R subtype U,  
165 one can infer that the basal N\* ancestor probably lived at 39500-34425 years ago and  
166 cannot be much earlier than 39500 years ago or older than R\*. It is therefore highly  
167 unlikely to detect the presence of N in future samples older than 45000 years or the  
168 oldest R.

169 There were two M samples aged 34000-35000 years, Goyet Q116-1 and Goyet  
170 Q376-3 from Belgium, found among samples older than 30000 years, and one M  
171 sample of 28000 years old from La Rochette France [54, 55]. As M is downstream of R  
172 and N in the Asia model but is parallel to N in the Africa model, the rarity of M relative  
173 to R and N in samples older than 35000 years is consistent with the Asia model but  
174 not the Africa model.

175 That R\* haplotype was found to be 5000 year older than N\* haplotype as  
176 discussed above is consistent with the 2 SNP difference between R and N (Figure 1)  
177 and the mtDNA mutation rate of  $2.67 \times 10^{-8}$  substitution per site per year (5000 x 16500  
178 x  $2.67 \times 10^{-8} = 2.2$  substitution) as recently used by others [46]. This suggests that the

---

179 ages of the oldest R\* and N\* samples found so far were likely to be close to the real  
180 ages for the R and N ancestors. If the Africa model is true, the age of the original  
181 African L0 ancestor of all modern humans would be 120000 years old (35 SNPs  
182 separate L0 and N). However, as there are no completely modern humans found in  
183 Africa that are more than 50000 years old, the L0 lineage may be unrealistic.

184       The original mtDNA type should leave more descendants today than the subtypes  
185 because mutations are rare events and occur only to rare individuals in a large  
186 population. We next asked whether the R haplotype is more popular today than other  
187 types by examining the data collected by the mitomap database  
188 (<https://www.mitomap.org/MITOMAP>). There are 64531 R samples in the database,  
189 representing 53.6% of the whole collection. While the database may not be free of  
190 sampling bias, one can nonetheless infer that it is highly likely for the R group to be  
191 larger than any other haplogroup as it is found larger than all the other haplogroups  
192 combined.

193       In contrast to the Asia model, the Africa model requires rare individuals with new  
194 mutations to have a reproductive advantage over ancestral populations, hence  
195 accounting for why the R group is much larger than any of its ancestor group, or why  
196 L0 is smaller than the mutant group L1'2'3'4'5'6, why L1 is smaller than the mutant  
197 group L2'3'4'5'6, why L5 is smaller than the mutant group L2'3'4'6, why L2 is smaller  
198 than the mutant group L3'4'6, why L6 is smaller than the mutant group L3'4, and why  
199 L4 is smaller than the mutant group L3. Such repeated reproductive advantages that  
200 must be granted to each round of new mutations leading to a new haplotype are in

---

201 plain contradiction to the neutral mutation premise required to build the Africa model in  
202 the first place.

203 In summary, the Out of East Asia mtDNA model is inherently more sound and  
204 self-consistent than the African Eve model due to stronger theoretical foundations and  
205 far more realistic assumptions. The original R and N are likely to have ages close to  
206 those of the so far found oldest R\* and N\* samples, which showed that R\* is older  
207 than N\* by 5000 years. These results plainly invalidate the African Eve model and  
208 confirm the Out of Asia model. We expect our conclusion here to be further  
209 strengthened by future ancient DNA studies.

210

211 **Methods:**

212 Sequence alignment and mismatches were performed using blastn at the NCBI  
213 database. The number of back mutations in the mtDNA tree was inferred by counting  
214 the exclamation marks (!) that designate the back mutations in the official mtDNA tree  
215 phylotree (<http://www.phylotree.org/>). The number of R samples in the mitomap  
216 database (<https://www.mitomap.org/MITOMAP>) were calculated by counting the  
217 number of haplotypes having the R defining SNP 16223C.

218

219 **Acknowledgments:**

220 Supported by the National Natural Science Foundation of China grant 81171880,  
221 the National Basic Research Program of China grant 2011CB51001 (S.H.).

222

---

223 **References:**

- 224 [1] Stringer CB, Andrews P. Genetic and fossil evidence for the origin of modern humans.  
225 Science 1988;239:1263-8.
- 226 [2] Thorne AG, Wolpoff MH. Regional continuity in Australasian Pleistocene hominid evolution.  
227 Am J Phys Anthropol 1981;55:337-49.
- 228 [3] Wolpoff MH, Wu XZ, Thorne AG. Modern homo sapiens origins: a general theory of hominid  
229 evolution involving the fossil evidence from east Asia. New York: Alan R. Liss, 1984.
- 230 [4] Wu X. On the origin of modern humans in China. Quaternary International  
231 2004;117:131-40.
- 232 [5] Yuan D, Lei X, Gui Y, Zhu Z, Wang D, Yu J, et al. Modern human origins: multiregional  
233 evolution of autosomes and East Asia origin of Y and mtDNA. bioRxiv 2017:doi:  
234 <https://doi.org/10.1101/106864>.
- 235 [6] Cann RL, Stoneking AC, Wilson AC. Mitochondrial DNA and human evolution. Nature  
236 1987;325:31-6.
- 237 [7] Green RE, Krause J, et., al. A draft sequence of the Neandertal Genome. Science  
238 2010;328:710-22.
- 239 [8] Meyer M, Kircher M, Gansauge MT, Li H, Racimo F, Mallick S, et al. A High-Coverage  
240 Genome Sequence from an Archaic Denisovan Individual. Science 2012.
- 241 [9] Fu Q, Hajdinjak M, Moldovan OT, Constantin S, Mallick S, Skoglund P, et al. An early  
242 modern human from Romania with a recent Neanderthal ancestor. Nature 2015;524:216-9.
- 243 [10] Fu Q, Li H, Moorjani P, Jay F, Slepchenko SM, Bondarev AA, et al. Genome sequence of a  
244 45,000-year-old modern human from western Siberia. Nature 2014;514:445-9.
- 245 [11] Vernot B, Akey JM. Resurrecting surviving Neandertal lineages from modern human  
246 genomes. Science 2014;343:1017-21.
- 247 [12] Hublin JJ, Ben-Ncer A, Bailey SE, Freidline SE, Neubauer S, Skinner MM, et al. New  
248 fossils from Jebel Irhoud, Morocco and the pan-African origin of Homo sapiens. Nature  
249 2017;546:289-92.
- 250 [13] White TD, Asfaw B, DeGusta D, Gilbert H, Richards G, Suwa G, et al. Pleistocene Homo  
251 sapiens from Middle Awash, Ethiopia. Nature 2003;423:742-7.
- 252 [14] Scerri EML, Thomas MG, Manica A, Gunz P, Stock JT, Stringer C, et al. Did Our Species  
253 Evolve in Subdivided Populations across Africa, and Why Does It Matter? Trends Ecol Evol  
254 2018;33:582-94.
- 255 [15] Liu W, Martinon-Torres M, Cai YJ, Xing S, Tong HW, Pei SW, et al. The earliest  
256 unequivocally modern humans in southern China. Nature 2015;526:696-9.
- 257 [16] Johnson MJ, Wallace DC, Ferris SD, Rattazzi MC, Cavalli-Sforza LL. Radiation of human  
258 mitochondria DNA types analyzed by restriction endonuclease cleavage patterns. J Mol Evol  
259 1983;19:255-71.
- 260 [17] Ayala FJ. Molecular clock mirages. BioEssays 1999;21:71-5.
- 261 [18] Ayala FJ. On the virtues and pitfalls of the molecular evolutionary clock. J Hered  
262 1986;77:226-35.
- 263 [19] Hu T, Long M, Yuan D, Zhu Z, Huang Y, Huang S. The genetic equidistance result,  
264 misreading by the molecular clock and neutral theory and reinterpretation nearly half of a  
265 century later. Sci China Life Sci 2013;56:254-61.

- 
- 266 [20] Huang S. The genetic equidistance result of molecular evolution is independent of  
267 mutation rates. *J. Comp. Sci. Syst. Biol.* 2008;1:092-102.
- 268 [21] Huang S. The overlap feature of the genetic equidistance result, a fundamental biological  
269 phenomenon overlooked for nearly half of a century. *Biological Theory* 2010;5:40-52.
- 270 [22] Kumar S. Molecular clocks: four decades of evolution. *Nat Rev Genet* 2005;6:654-62.
- 271 [23] Hahn MW. Toward a selection theory of molecular evolution. *Evolution* 2008;62:255-65.
- 272 [24] Kreitman M. The neutral theory is dead. Long live the neutral theory. *Bioessays*  
273 1996;18:678-83; discussion 83.
- 274 [25] Ohta T, Gillespie JH. Development of Neutral and Nearly Neutral Theories. *Theor Popul*  
275 *Biol* 1996;49:128-42.
- 276 [26] Ballard JW, Kreitman M. Is mitochondrial DNA a strictly neutral marker? *Trends Ecol Evol*  
277 1995;10:485-8.
- 278 [27] Leffler EM, Bullaughey K, Matute DR, Meyer WK, Segurel L, Venkat A, et al. Revisiting an  
279 old riddle: what determines genetic diversity levels within species? *PLoS Biol*  
280 2012;10:e1001388.
- 281 [28] Huang S. New thoughts on an old riddle: What determines genetic diversity within and  
282 between species? *Genomics* 2016;108:3-10.
- 283 [29] Zhu Z, Lu Q, Wang J, Huang S. Collective effects of common SNPs in foraging decisions  
284 in *Caenorhabditis elegans* and an integrative method of identification of candidate genes. *Sci.*  
285 *Rep.* 2015;doi:10.1038/srep16904.
- 286 [30] Zhu Z, Yuan D, Luo D, Lu X, Huang S. Enrichment of Minor Alleles of Common SNPs and  
287 Improved Risk Prediction for Parkinson's Disease. *PLoS ONE* 2015;10:e0133421.
- 288 [31] Zhu Z, Man X, Xia M, Huang Y, Yuan D, Huang S. Collective effects of SNPs on  
289 transgenerational inheritance in *Caenorhabditis elegans* and budding yeast. *Genomics*  
290 2015;106:23-9.
- 291 [32] Biswas K, Chakraborty S, Podder S, Ghosh TC. Insights into the dN/dS ratio  
292 heterogeneity between brain specific genes and widely expressed genes in species of different  
293 complexity. *Genomics* 2016;108:11-7.
- 294 [33] Zhu Z, Lu Q, Zeng F, Wang J, Huang S. Compatibility between mitochondrial and nuclear  
295 genomes correlates with quantitative trait of lifespan in *Caenorhabditis elegans*. *Sci. Rep.*  
296 2015;doi:10.1038/srep17303.
- 297 [34] Huang S. Primate phylogeny: molecular evidence for a pongid clade excluding humans  
298 and a prosimian clade containing tarsiers. *Sci China Life Sci* 2012;55:709-25.
- 299 [35] Huang S. Inverse relationship between genetic diversity and epigenetic complexity.  
300 Preprint available at Nature Precedings 2009;doi.org/10.1038/npre.2009.1751.2.
- 301 [36] Huang S. *Histone methylation and the initiation of cancer, Cancer Epigenetics.* New York:  
302 CRC Press, 2008.
- 303 [37] Margoliash E. Primary structure and evolution of cytochrome c. *Proc. Natl. Acad. Sci.*  
304 1963;50:672-9.
- 305 [38] Luo D, Huang S. The genetic equidistance phenomenon at the proteomic level. *Genomics*  
306 2016;108:25-30.
- 307 [39] Yuan D, Huang S. On the peopling of the Americas: molecular evidence for the  
308 Paleoamerican and the Solutrean models. *bioRxiv* 2017;bioRxiv 130989; doi:  
309 <https://doi.org/10.1101/130989>

- 
- 310 [40] Zhang Y, Lei X, Chen H, Zhou H, Huang S. Ancient DNAs and the Neolithic Chinese  
311 super-grandfather Y haplotypes. *bioRxiv* 2018;doi: <https://doi.org/10.1101/487918>.
- 312 [41] Meyer M, Fu Q, Aximu-Petri A, Glocke I, Nickel B, Arsuaga JL, et al. A mitochondrial  
313 genome sequence of a hominin from Sima de los Huesos. *Nature* 2014;505:403-6.
- 314 [42] Teske PR, Golla TR, Sandoval-Castillo J, Emami-Khoyi A, van der Lingen CD, von der  
315 Heyden S, et al. Mitochondrial DNA is unsuitable to test for isolation by distance. *Sci Rep*  
316 2018;8:8448.
- 317 [43] Towarnicki SG, Ballard JWO. Mitotype Interacts With Diet to Influence Longevity, Fitness,  
318 and Mitochondrial Functions in Adult Female *Drosophila*. *Front Genet* 2018;9:593.
- 319 [44] Fu Q, Meyer M, Gao X, Stenzel U, Burbano HA, Kelso J, et al. DNA analysis of an early  
320 modern human from Tianyuan Cave, China. *Proc Natl Acad Sci U S A* 2013;110:2223-7.
- 321 [45] Benazzi S, Slon V, Talamo S, Negrino F, Peresani M, Bailey SE, et al. Archaeology. The  
322 makers of the Protoaurignacian and implications for Neandertal extinction. *Science*  
323 2015;348:793-6.
- 324 [46] Deviese T, Massilani D, Yi S, Comeskey D, Nagel S, Nickel B, et al. Compound-specific  
325 radiocarbon dating and mitochondrial DNA analysis of the Pleistocene hominin from Salkhit  
326 Mongolia. *Nat Commun* 2019;10:274.
- 327 [47] Hershkovitz I, Weber GW, Quam R, Duval M, Grun R, Kinsley L, et al. The earliest modern  
328 humans outside Africa. *Science* 2018;359:456-9.
- 329 [48] Groucutt HS, Grun R, Zalmout IAS, Drake NA, Armitage SJ, Candy I, et al. *Homo sapiens*  
330 in Arabia by 85,000 years ago. *Nat Ecol Evol* 2018;2:800-9.
- 331 [49] Athreya S, Wu X. A multivariate assessment of the Dali hominin cranium from China:  
332 Morphological affinities and implications for Pleistocene evolution in East Asia. *Am J Phys*  
333 *Anthropol* 2017;164:679-701.
- 334 [50] Zhao L, Zhang L, Du B, Nian XM, Zheng Y, Zhang Z, et al. New discovery of human fossils  
335 and associated mammal faunas in Bijie Guizhou. *Acta Anthropologica Sinica* 2016;35:24-35.
- 336 [51] Curnoe D, Ji X, Shajin H, Tacon PSC, Li Y. Dental remains from Longtanshan cave 1  
337 (Yunnan, China), and the initial presence of anatomically modern humans in East Asia.  
338 *Quaternary International* 2016;400:180-6.
- 339 [52] Bae CJ, Wang W, Zhao J, Huang S, Tian F, Shen G. Modern human teeth from Late  
340 Pleistocene Luna Cave (Guangxi, China). *Quaternary International* 2014;354:169-83.
- 341 [53] Li ZY, Wu XJ, Zhou LP, Liu W, Gao X, Nian XM, et al. Late Pleistocene archaic human  
342 crania from Xuchang, China. *Science* 2017;355:969-72.
- 343 [54] Fu Q, Posth C, Hajdinjak M, Petr M, Mallick S, Fernandes D, et al. The genetic history of  
344 Ice Age Europe. *Nature* 2016;534:200-5.
- 345 [55] Posth C, Renaud G, Mittnik A, Drucker DG, Rougier H, Cupillard C, et al. Pleistocene  
346 Mitochondrial Genomes Suggest a Single Major Dispersal of Non-Africans and a Late Glacial  
347 Population Turnover in Europe. *Curr Biol* 2016;26:827-33.
- 348
- 349
